# Supplementary material for: Covalent co-assembly between resilin-like polypeptide and peptide amphiphile into hydrogels with controlled nanostructure and improved mechanical properties
Source: Royal Society of Chemistry journal article supplement (doi:10.1039/c9bm01796h), 2019-11-19
Supplement: c9bm01796h1.pdf [file c9bm01796h1.pdf]

## SUPPORTING INFORMATION

### **Covalent co-assembly between resilin-like polypeptide and peptide amphiphile into hydrogels with controlled nanostructure and improved mechanical properties**

Babatunde O. Okesola<sup>1,2</sup>, Hang Kuen Lau<sup>3</sup>, Burak Derkus<sup>1,2,4</sup>, Delali K. Boccorh<sup>5</sup>, Yuanhao Wu<sup>1,2</sup>, Alastair W. Wark<sup>5</sup>, Kristi L. Kiick<sup>3</sup>, Alvaro Mata<sup>1,2,6,7,8\*</sup>

<sup>1</sup>Institute of Bioengineering, Queen Mary University of London, Mile End Road, London, E1 4NS, United Kingdom, UK.

<sup>2</sup>School of Engineering and Materials Science, Queen Mary University of London, Mile End Road, London, E1 4NS, UK.

<sup>3</sup>Department of Materials Science and Engineering, University of Delaware, 201 DuPont Hall, Newark, DE 19716, USA.

<sup>4</sup>Biomedical Engineering Department, Eskisehir Osmangazi University, Eskisehir, TR 26040, Turkey.

<sup>5</sup>Centre for Molecular Nanometrology, Department of Pure and Applied Chemistry, University of Strathclyde, Technology and Innovation Centre, 99 George Street, Glasgow, G1 1RD, UK.

<sup>6</sup>School of Pharmacy, University of Nottingham, NG7 2RD, Nottingham, UK.

<sup>7</sup>Department of Chemical and Environmental Engineering, University of Nottingham, NG7 2RD, Nottingham, UK.

<sup>8</sup>Institute for BioDiscovery, University of Nottingham, NG7 2RD, Nottingham, UK.

\*Corresponding author's email: a.mata@qmul.ac.uk

## **Contents**

- 1. Raman spectra**
- 2. TEM image**
- 3. CD spectra**
- 4. Frequency sweep rheographs**
- 5.  $^1\text{H}$  NMR spectrum**
- 6. ESI-MS spectrum**
- 7. Analytical HPLC trace**

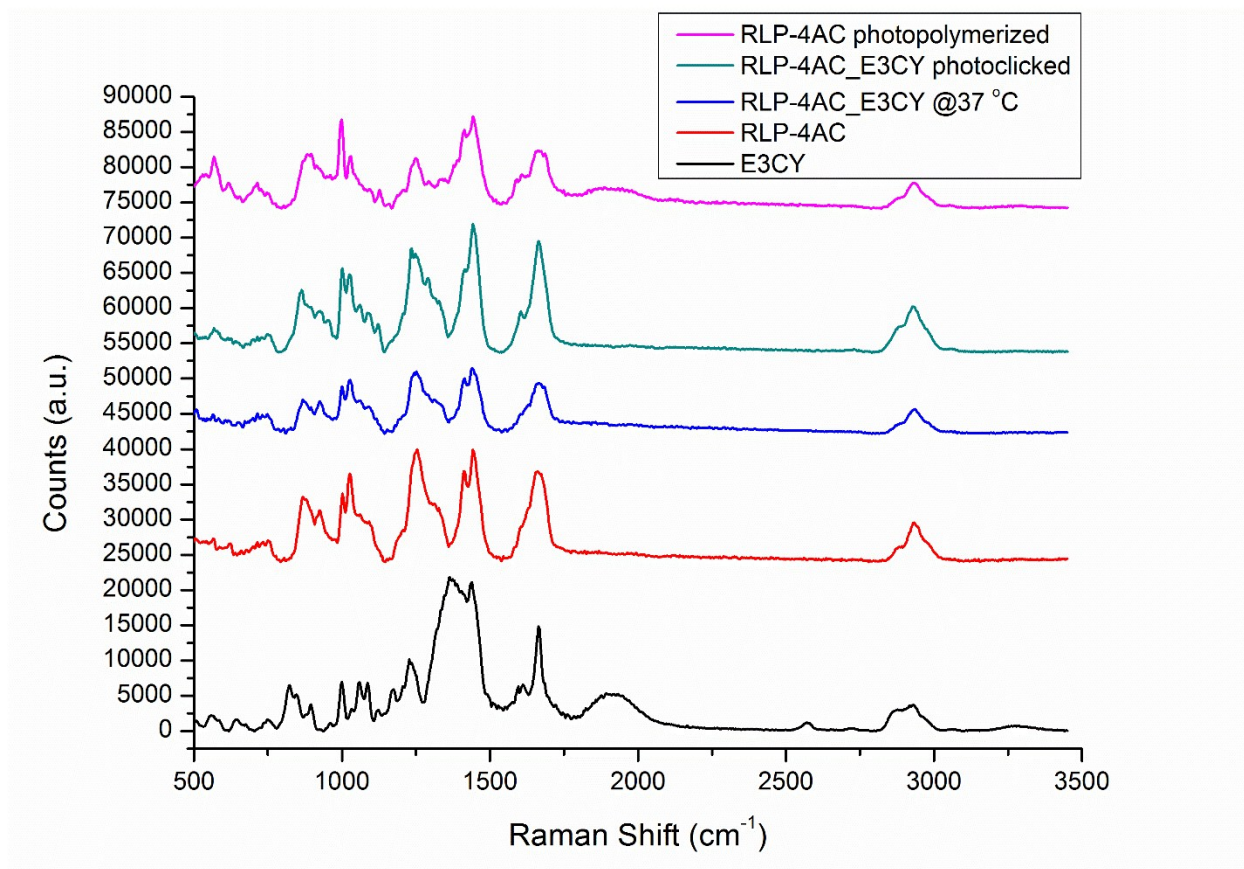

**Figure S1.** Raman spectra for E3CY, RLP-4AC, RLP\_E3CY@37°C, photoclicked RLP-4AC\_E3CY and photopolymerized RLP-4AC. Laser excitation wavelength: 785 nm. Laser power ~63 mW. Integration times: E3CY (25s); RLP-4AC (90s); RLP\_E3CY@37°C (45s); photoclicked RLP-4AC\_E3CY (45s); photopolymerized RLP-4AC (60s). Spectra are baseline corrected and spatially offset for clarity.

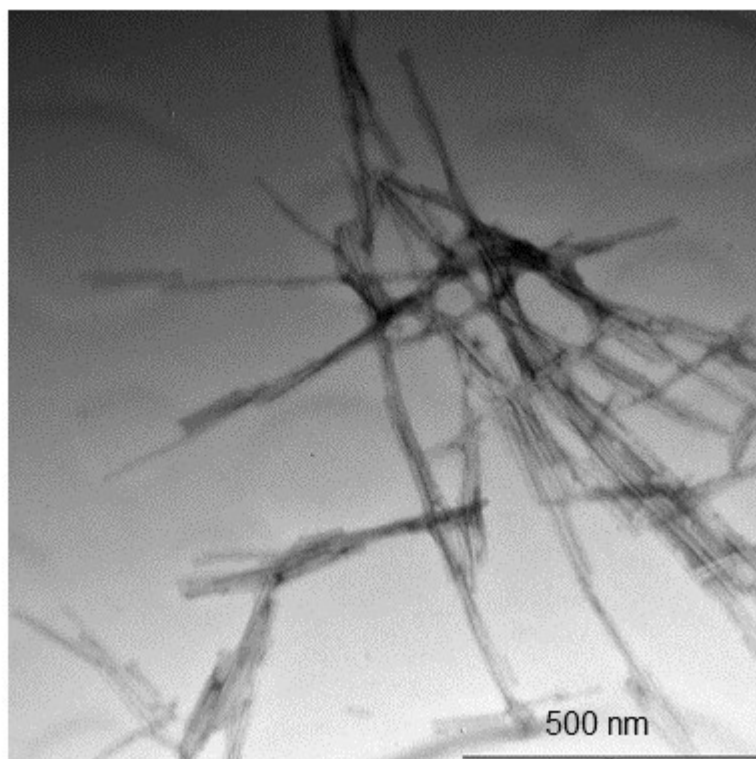

**Figure S2.** TEM micrograph of E3CY after photo irradiation showing the stability of the PA nanofibers to photodegradation.

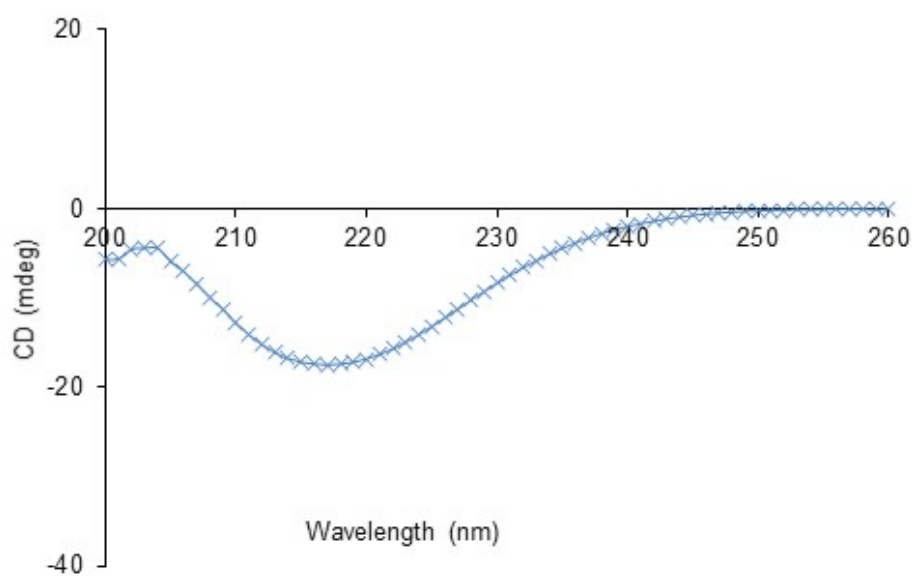

**Figure S3.** Circular dichroism spectra for E3CY solution (0.05% wt) in PBS 1x at 25 °C.

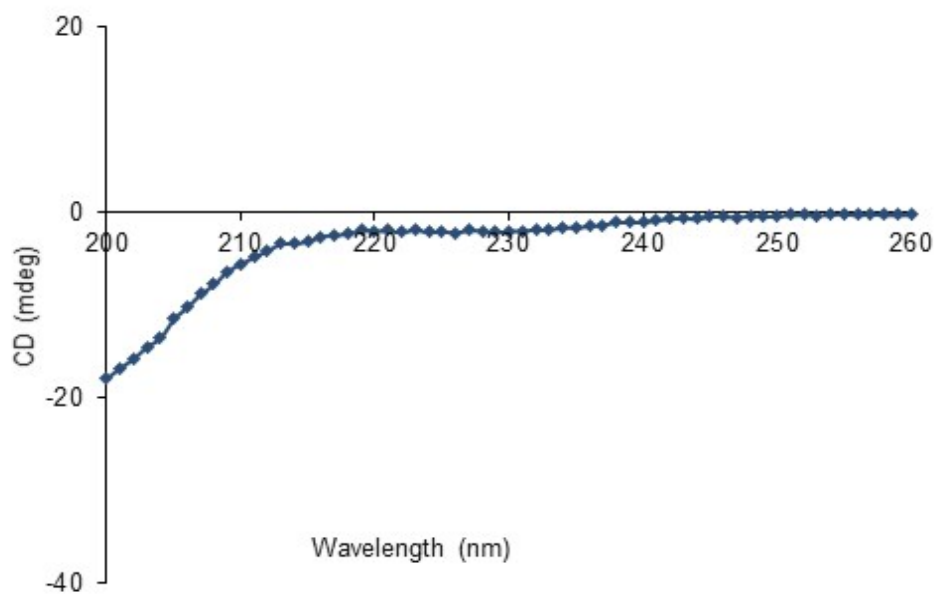

**Figure S4.** Circular dichroism spectra for RLP-4AC solution (0.25% wt) in PBS 1x at 25 °C.

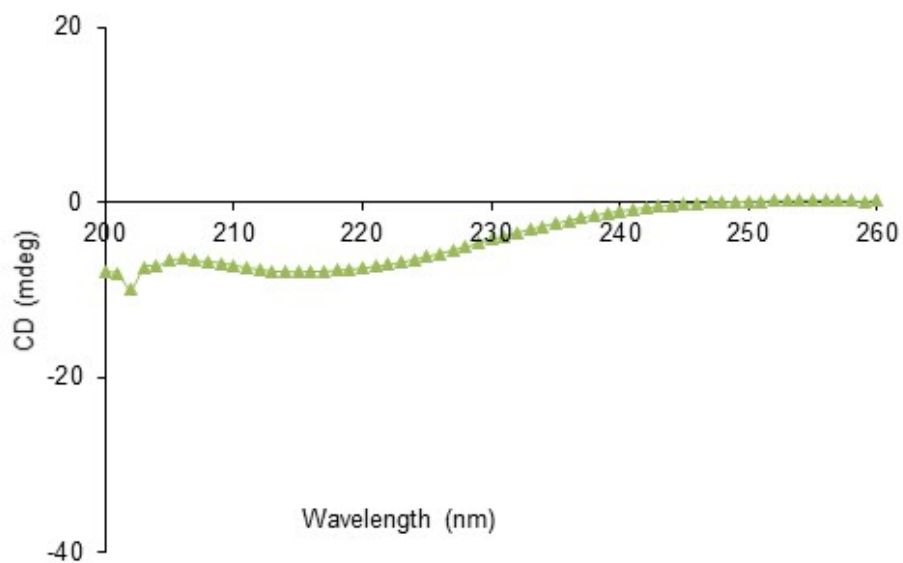

**Figure S5.** Circular dichroism spectra for the mixture of RLP-4AC (0.25%) with E3CY (0.01% wt) after 6 h of incubation at 37 °C.

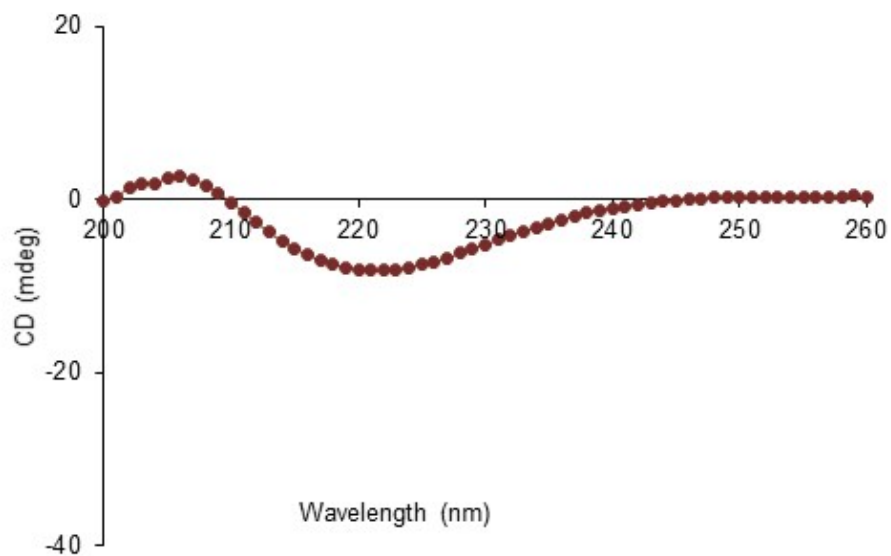

**Figure S6.** Circular dichroism spectra for the mixture of RLP-4AC (0.25%) with E3CY (0.025% wt) after 6 h of incubation at 37 °C.

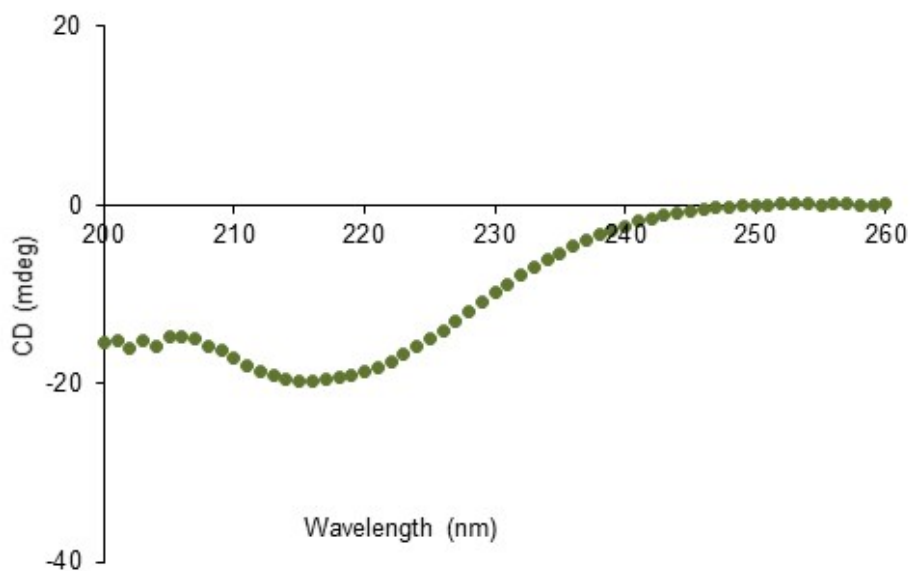

**Figure S7.** Circular dichroism spectra for the mixture of RLP-4AC (0.25%) with E3CY (0.05% wt) after 6 h of incubation at 37 °C.

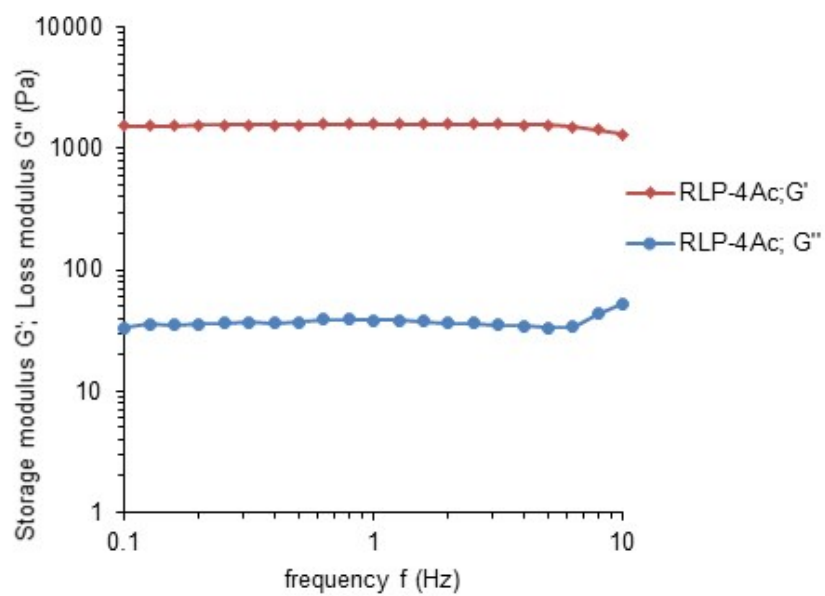

**Figure S8.** Frequency sweep rheographs for 5% wt RLP-4AC photopolymerized hydrogels.

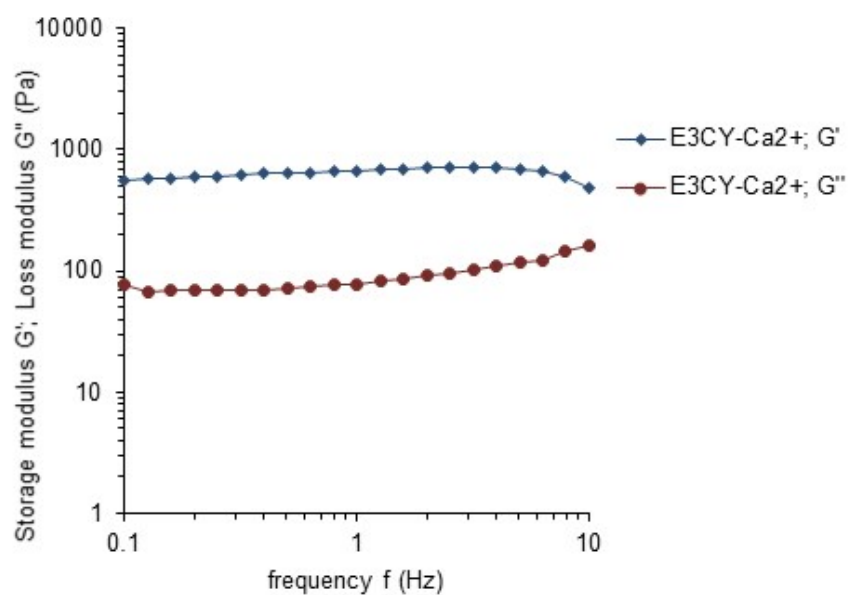

**Figure S9.** Frequency sweep rheographs for 1% wt E3CY- $\text{Ca}^{2+}$  hydrogels.

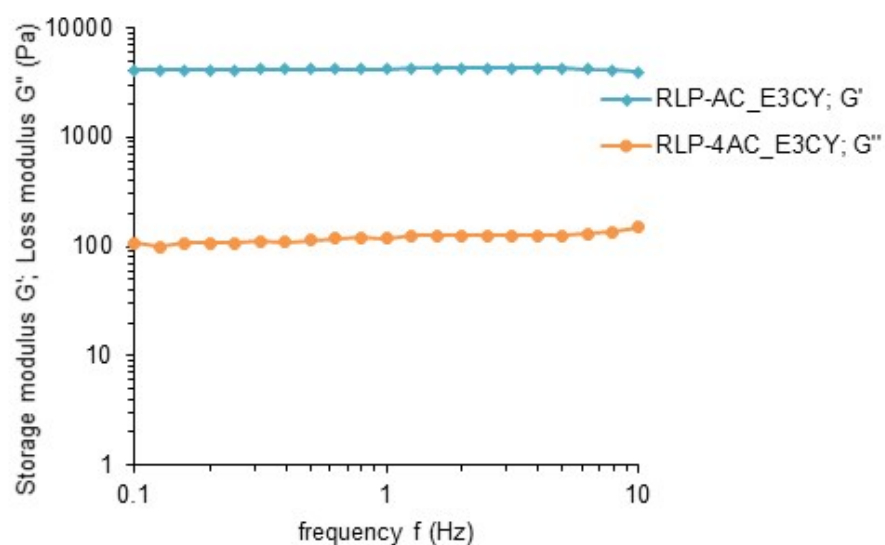

**Figure S10.** Frequency sweep rheographs for RLP-4AC\_E3CY hydrogels synthesized by thiol-ene photoclicked at 1 and 5% wt final concentrations of E3CY and RLP-4AC.

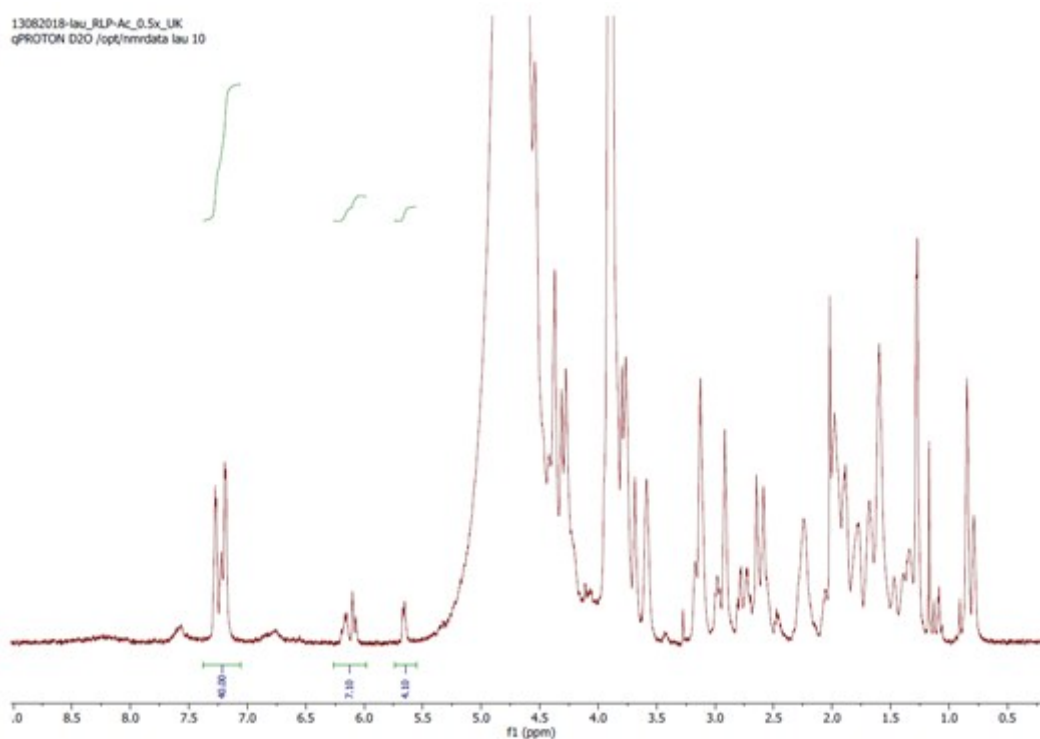

**Figure S11.**  $^1\text{H}$  NMR spectrum showing the vinylic protons of acrylamide integrated against the lysine amine protons of RLP backbone.

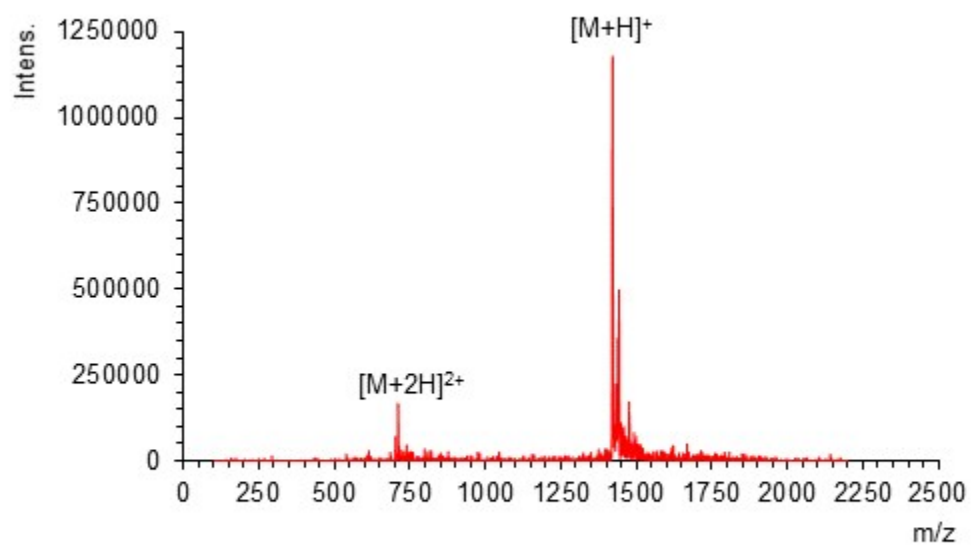

**Figure S12.** ESI-MS spectrum of E3CY peptide amphiphile

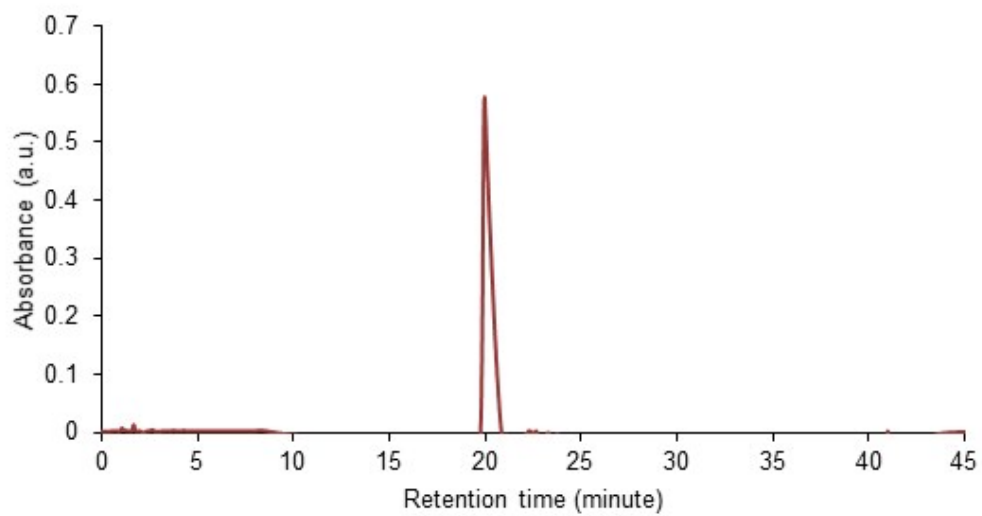

**Figure S13.** HPLC trace of E3CY peptide amphiphile
